# Supplementary material
Source: PubMed Central journal article supplement (PMC1187830)
Supplement: pbio.0030248.sg007.pdf [file pbio.0030248.sg007.pdf]

*Streptococcus dysgalactiae equisimilis* Rel<sub>seq</sub> (739 aa; SWISS-PROT:RELA\_STREQ, PDB:1VJ7)

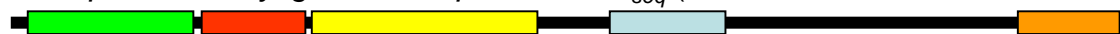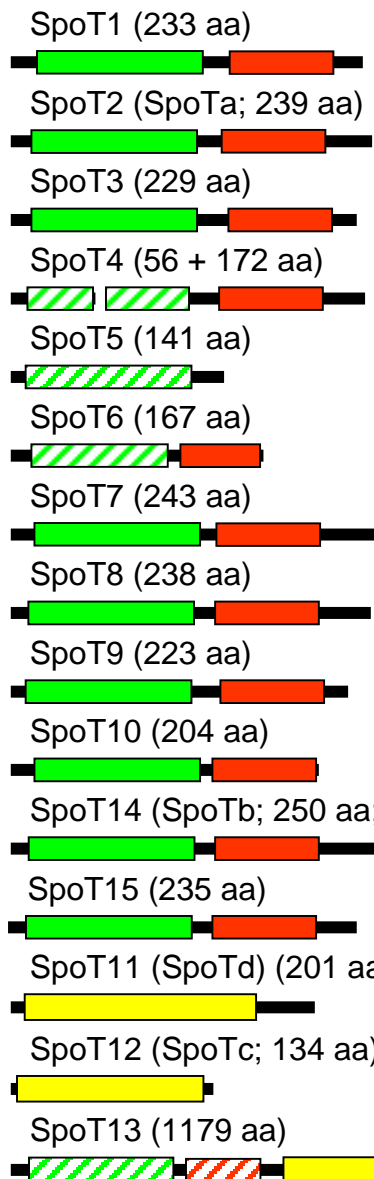

|        | Rfe | Rco | Rsi | Rpr | Rty |
|--------|-----|-----|-----|-----|-----|
| SpoT1  | Ch  | s   | Ch  | a   | a   |
| SpoT2  | Ch  | Ch  | Ch  | Ch  | Ch  |
| SpoT3  | Ch  | Ch  | Ch  | a   | a   |
| SpoT4  | s   | s   | s   | a   | a   |
| SpoT5  | s   | a   | a   | a   | a   |
| SpoT6  | s   | a   | a   | a   | a   |
| SpoT7  | Ch  | a   | a   | a   | a   |
| SpoT8  | Ch  | a   | a   | a   | a   |
| SpoT9  | Ch  | a   | a   | a   | a   |
| SpoT10 | Ch  | a   | a   | a   | a   |
| SpoT11 | Cs  | Cs  | Cs  | s   | Cs  |
| SpoT12 | Cs  | a   | a   | Cs  | Cs  |
| SpoT13 | Cs  | a   | a   | a   | a   |
| SpoT14 | a   | a   | a   | Ch  | Ch  |
| SpoT15 | Ch  | a   | a   | a   | a   |

■ Hydrolase domain  
■ Hydrolase domain (degraded)  
■ Linker domain  
■ Linker domain (degraded)  
■ Synthetase domain  
■ TGS domain  
■ ACT domain  
■ Ankyrin repeat
