# Supplementary material
Source: PubMed Central journal article supplement (PMC1187830)

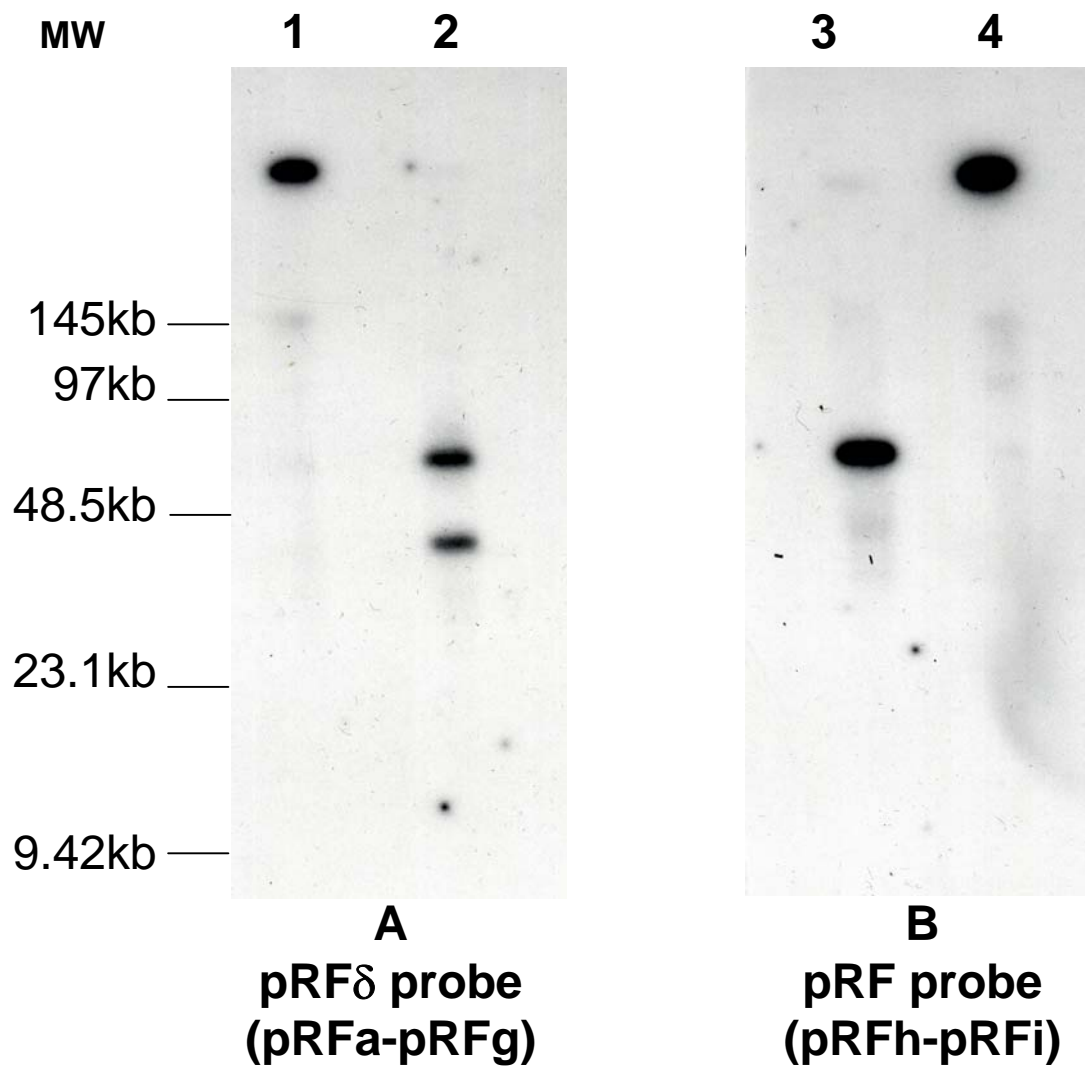

Supplement: pbio.0030248.sg002.pdf [file pbio.0030248.sg002.pdf]

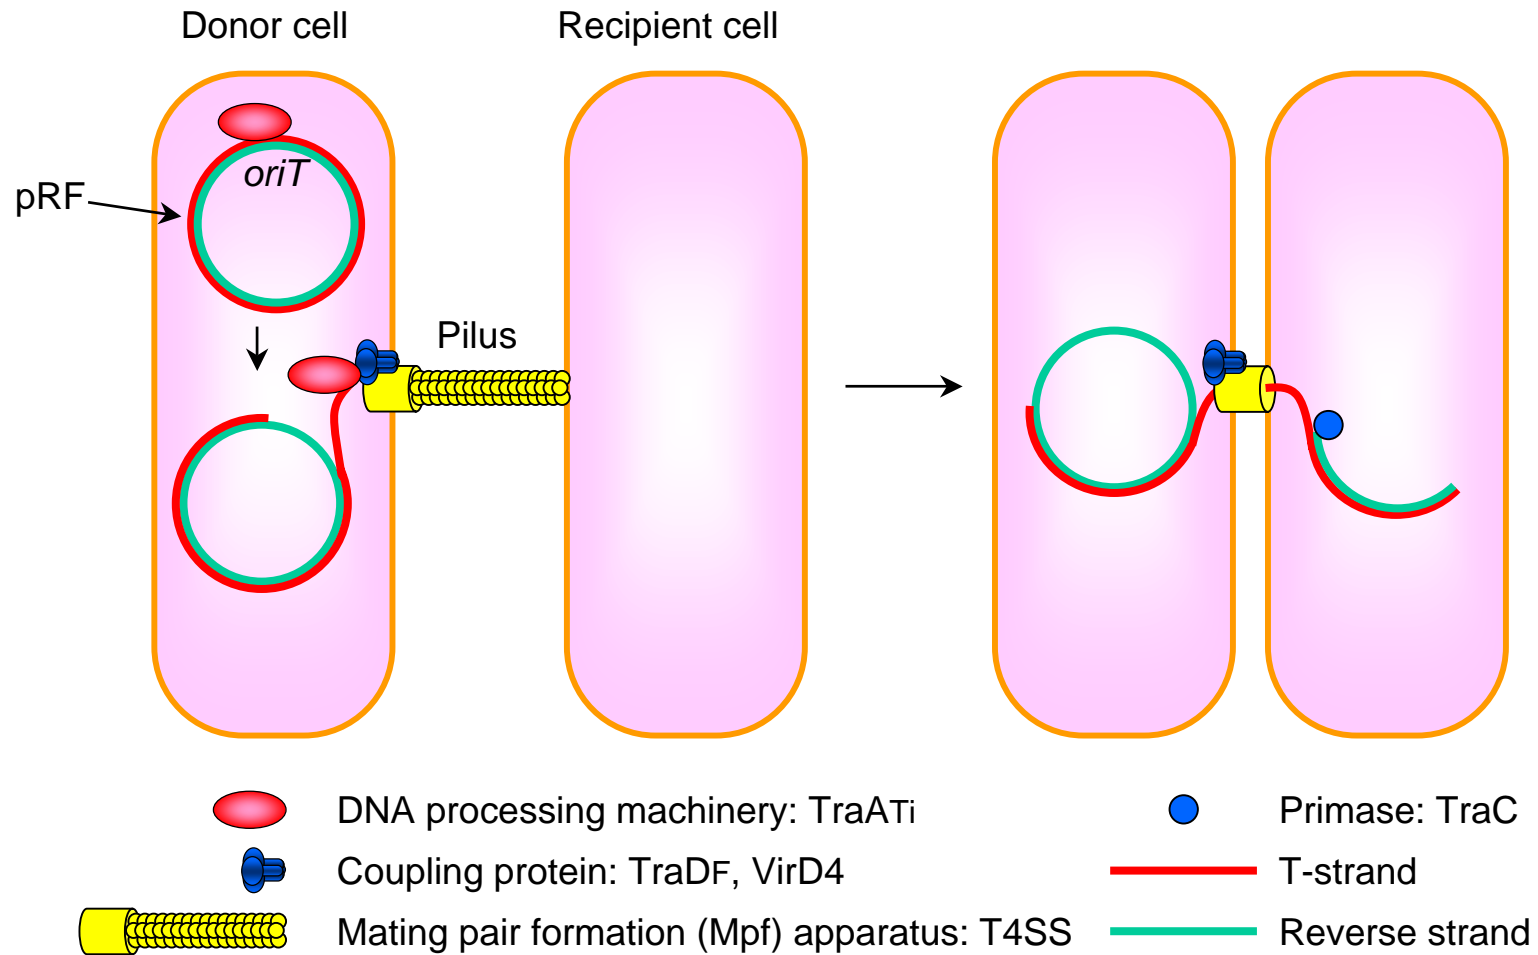

Supplement: pbio.0030248.sg003.pdf [file pbio.0030248.sg003.pdf]

Patatin-like protein

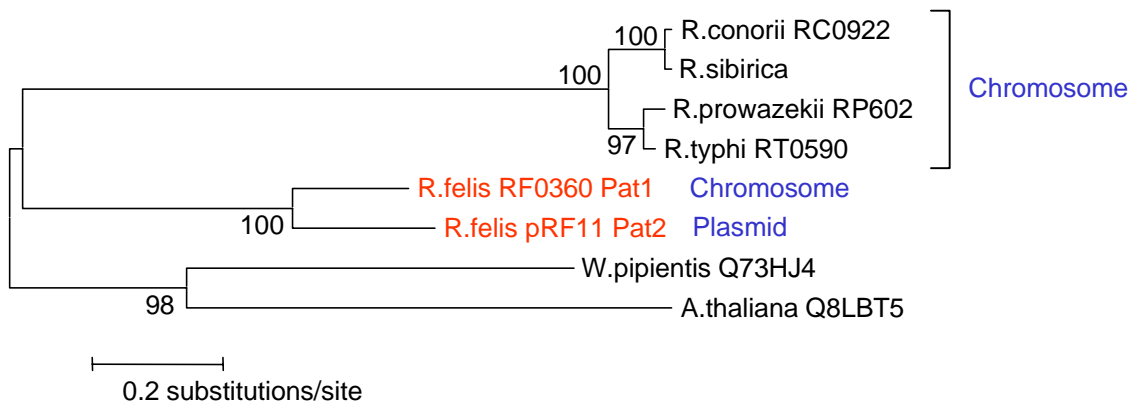

TMK

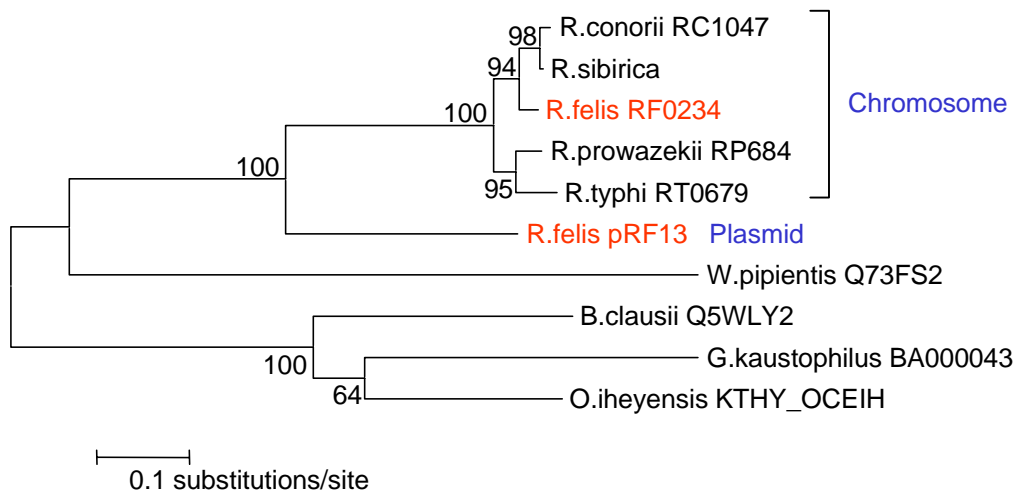

Small heat shock protein

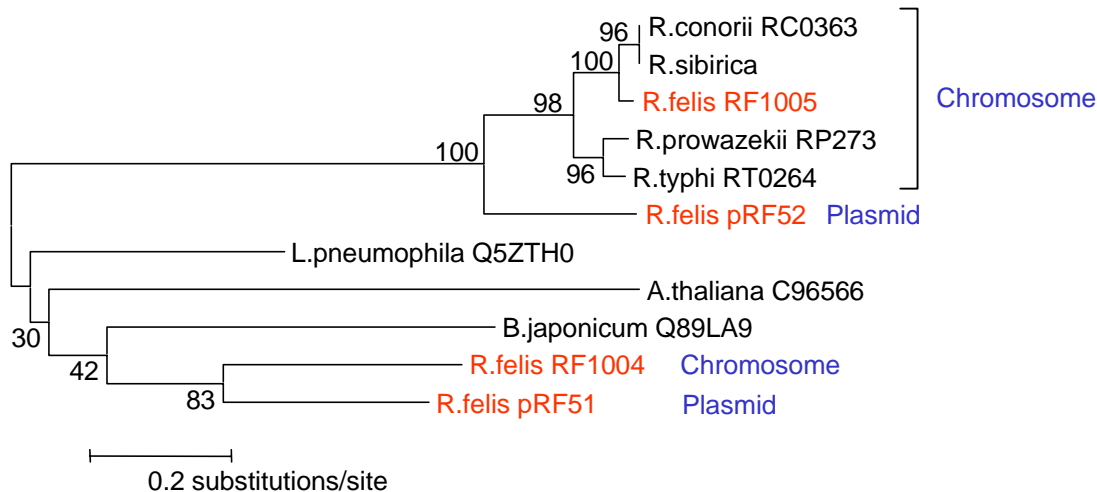

Supplement: pbio.0030248.sg004.pdf [file pbio.0030248.sg004.pdf]

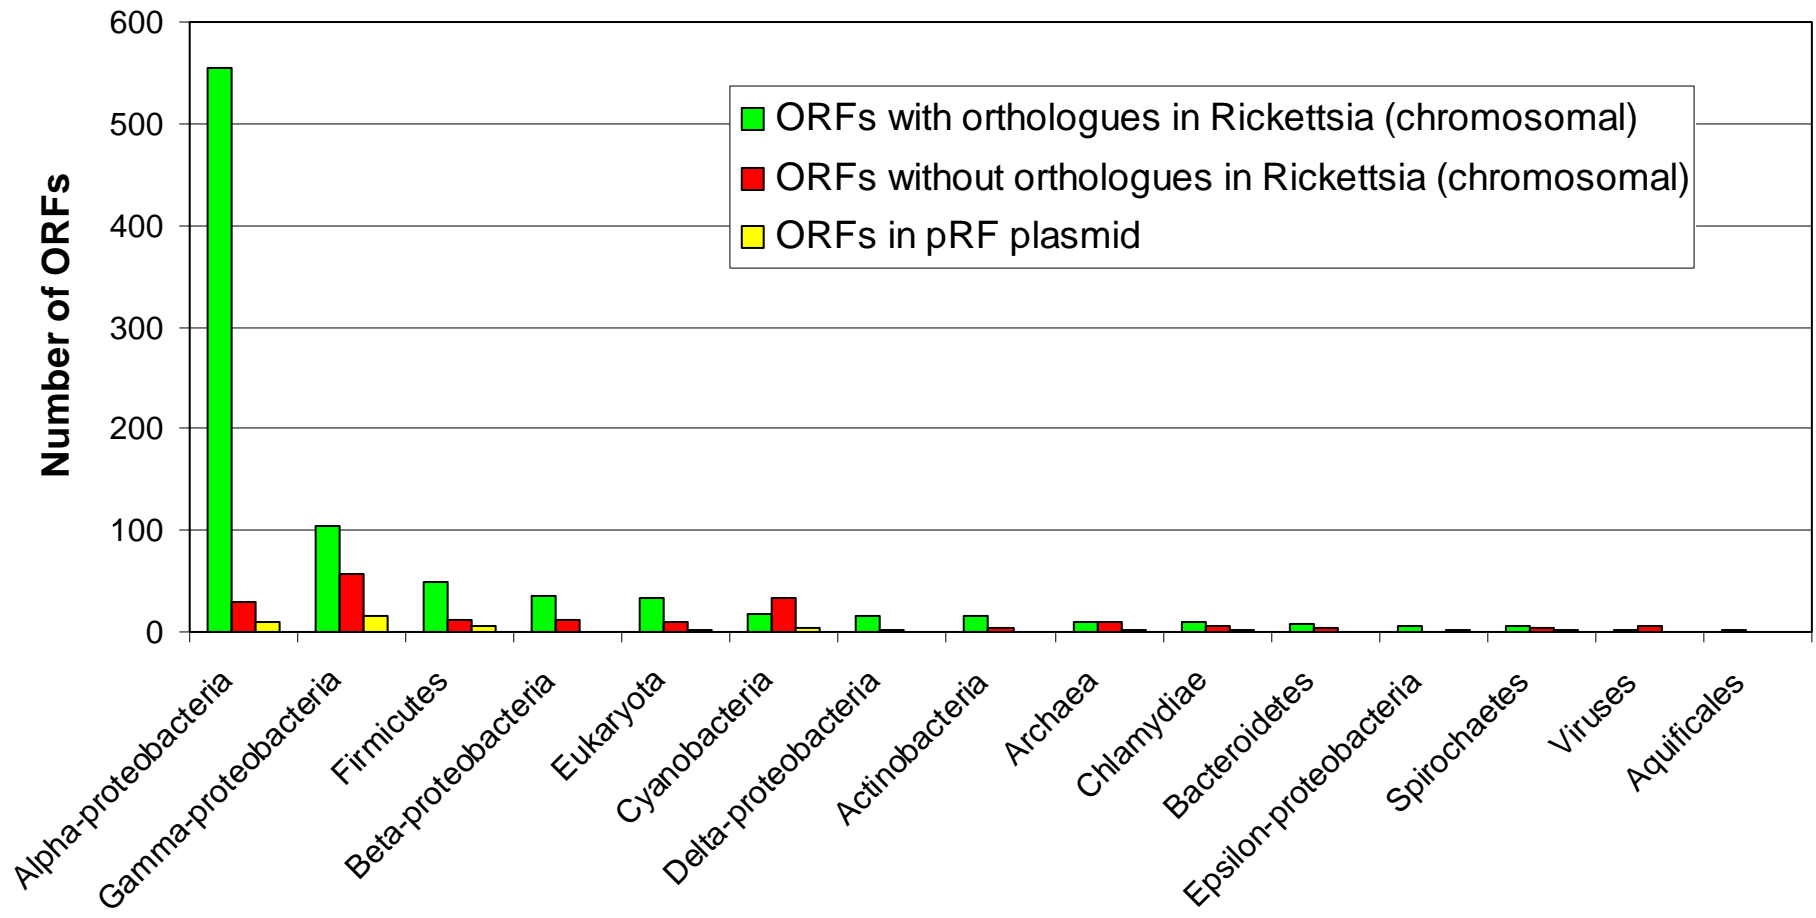

Supplement: pbio.0030248.sg005.pdf [file pbio.0030248.sg005.pdf]

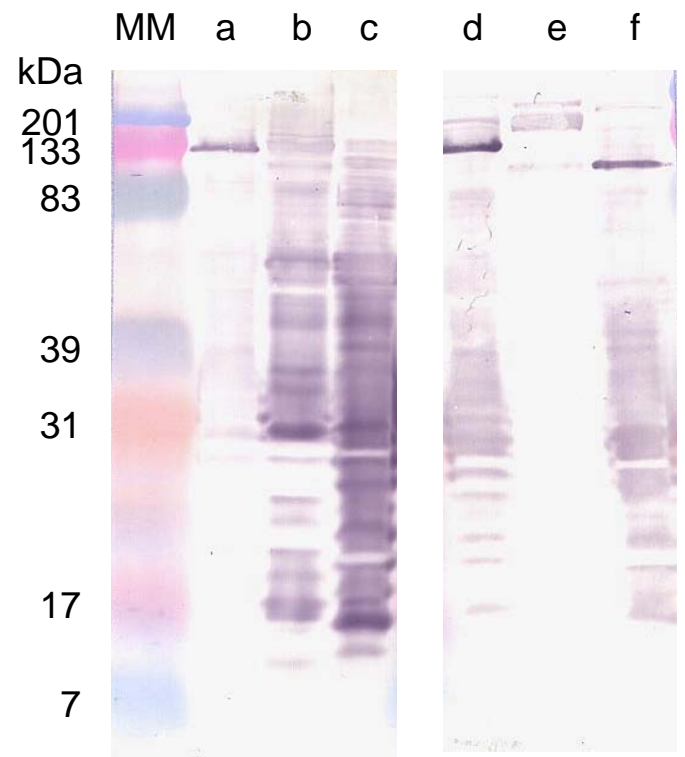

Supplement: pbio.0030248.sg006.pdf [file pbio.0030248.sg006.pdf]

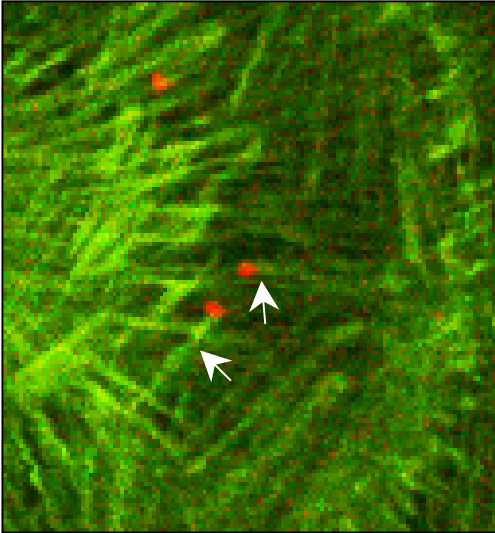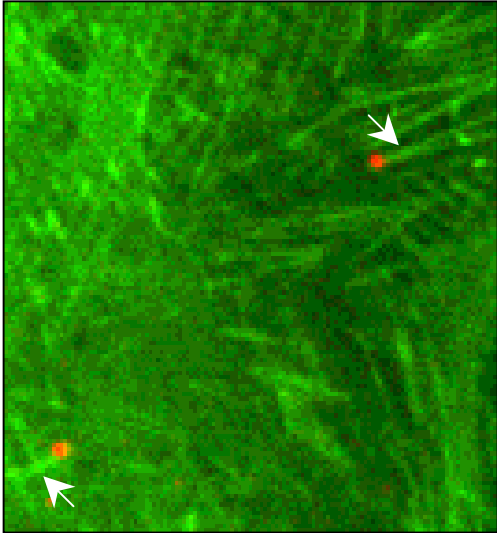

Supplement: pbio.0030248.sg008.pdf [file pbio.0030248.sg008.pdf]
